# Supplementary material for: Clinical Response to Azacitidine in Myelodysplastic Neoplasms is Associated with Distinct DNA Methylation Changes in Haematopoietic Stem and Progenitor cells in vivo
Source: bioRxiv or medRxiv preprint supplement (doi:10.1101/2024.07.19.24310679), 2024-07-23
Supplement: Supplementary file [file media-2.pdf]

## **Supplemental tables and figures**

### List of Supplemental Tables

Table S1: Baseline demographic and disease characteristics of all participants.

Table S2: Disease response summary

Table S3: IWG2023 classifications

Table S4: Delayed treatment cycles

Table S5: Serious adverse events and adverse events

Table S6: Myeloid gene panel

Table S7: Variant allele frequencies at diagnosis, C6D29, C12D29, and Progression

**Table S1: Baseline demographic and disease characteristics of all participants.**

\* Cytopenias defined as haemoglobin < 100 g/L, absolute neutrophil count < 1.8 x 10<sup>9</sup>/L, platelet count < 100 x 10<sup>9</sup>/L.

| <b>Characteristic</b>                            | <b>MDS n= 31<br/>(77.5%)</b> | <b>AML n= 6<br/>(15%)</b> | <b>CMML n= 3<br/>(7.5%)</b> |
|--------------------------------------------------|------------------------------|---------------------------|-----------------------------|
| <b>Age (yrs) median (min,max)</b>                | 76.2 (65.9, 87.4)            | 77.3 (74.9, 83.8)         | 73 (73, 82.1)               |
| <b>Gender n(%)</b>                               |                              |                           |                             |
| <b>Female</b>                                    | 9 (22.5)                     | 2 (5)                     | 1 (2.5)                     |
| <b>Male</b>                                      | 22 (55)                      | 4 (10)                    | 2 (5)                       |
| <b>ECOG PS n (%)</b>                             |                              |                           |                             |
| 0                                                | 17 (42.5)                    | 1 (2.5)                   | 1 (2.5)                     |
| 1                                                | 10 (25)                      | 4 (10)                    | 2 (5)                       |
| 2                                                | 4 (10)                       | 1 (2.5)                   | 0                           |
| <b>BMA blast count % median (min,max)</b>        | 12 (1, 20)                   | 22.5 (20, 30)             | 11 (10, 18)                 |
| <b>IPSS risk group n= (%)</b>                    |                              |                           |                             |
| Low                                              | 0                            |                           |                             |
| Int-1                                            | 0                            |                           |                             |
| Int-2 (1.5-2)                                    | 22 (71)                      |                           |                             |
| High risk (≥2.5)                                 | 9 (29)                       |                           |                             |
| <b>IPSS-R risk group n= (%)</b>                  |                              |                           |                             |
| Very low                                         | 0                            |                           |                             |
| Low                                              | 1 (3)                        |                           |                             |
| Intermediate                                     | 3 (10)                       |                           |                             |
| High                                             | 15 (48)                      |                           |                             |
| Very high                                        | 12 (39)                      |                           |                             |
| <b>Karyotype n= (%)</b>                          |                              |                           |                             |
| Normal, Y-, 5q-, 20q-                            | 13 (42)                      |                           |                             |
| Abnormal chromosome 7 or 3 or more abnormalities | 13 (42)                      |                           |                             |
| All other cytogenic abnormalities                | 5 (16)                       |                           |                             |
| <b>Cytopenia of 2 or 3 cell types* n= (%)</b>    |                              |                           |                             |
| No cytopenia or cytopenia of 1 cell type         | 6 (19)                       |                           |                             |
| Cytopenia of 2 or 3 cell types                   | 25 (81)                      |                           |                             |
| <b>ELN risk stratification n= (%)</b>            |                              |                           |                             |
| Favourable                                       |                              | 1 (17)                    |                             |
| Intermediate                                     |                              | 3 (50)                    |                             |
| Adverse                                          |                              | 2 (33)                    |                             |
| <b>WHO subtype</b>                               |                              |                           |                             |
| CMML-1 blasts                                    |                              |                           | 0 (0)                       |
| CMML-2 blasts                                    |                              |                           | 3 (100)                     |
| <b>Hematology</b>                                |                              |                           |                             |
| Hemoglobin median (min,max) g/L                  | 96 (73, 132)                 | 88 (79, 121)              | 106 (95, 124)               |
| ANC median (min,max) x 10 <sup>9</sup> /L        | 0.8 (0.2, 26.7)              | 1.7 (0.1, 6.7)            | 8.9 (4.3, 50.3)             |
| WCC median (min,max) x 10 <sup>9</sup> /L        | 2.3 (0.9, 74.1)              | 3.4 (0.7, 23)             | 14.8 (8.5, 81.1)            |
| Platelet median (min,max) x 10 <sup>9</sup> /L   | 61 (9, 438)                  | 43.5 (28, 320)            | 40 (23, 99)                 |

**Table S2: Disease response summary.** Shown are the number of participants achieving the indicated IWG response at end of injected phase (C6) and end of oral phase (C12) and a quantification of best response for each participant who completed the injection phase. Disease progression reported at timepoints other than IWG assessment at C6 and C12 is detailed in Figure 1C.

|               | <b>IWG response</b>            | <b>C6D29</b> | <b>C12D29</b> | <b>Best response</b> |
|---------------|--------------------------------|--------------|---------------|----------------------|
| Responder     | Complete remission (CR)        | 7            | 2             | 8                    |
|               | Partial remission (PR)         | 0            | 0             | 0                    |
|               | Marrow CR                      | 3            | 4             | 4                    |
|               | Hematological improvement (HI) | 6            | 1             | 6                    |
| Non-responder | Stable disease (SD)            | 5            | 2             | 3                    |
|               | Failure                        | 1            | 0             | 1                    |
|               | Relapse after CR or PR         | 0            | 1             | 0                    |
|               | Disease progression            | 2            | 1             | 2                    |
| Totals        |                                | 24           | 11            | 24                   |

**Table S3: IWG2023 classifications.** Compared to IWG2006, classification of one patient (\*; P10) changed from non-responder to responder at C12D29.

| Patient | Injection phase |               | Oral phase      |               |
|---------|-----------------|---------------|-----------------|---------------|
|         | IWG 2023        | Response      | IWG 2023        | Response      |
| P01     | CRbi            | Responder     | CRh             | Responder     |
| P02     | No response     | Non-responder |                 |               |
| P03     | CR              | Responder     | CR              | Responder     |
| P04     | CR              | Responder     | PD              | Non-responder |
| P05     | CR              | Responder     | Disease relapse | Non-responder |
| P06     | HI-P            | Responder     | No response     | Non-responder |
| P07     | No response     | Non-responder | CRuni           | Responder     |
| P08     | No response     | Non-responder |                 |               |
| P09     | No response     | Non-responder | CRh             | Responder     |
| P10     | HI-E            | Responder     | HI              | Responder *   |
| P11     | CRbi            | Responder     | CR              | Responder     |
| P12     | CR              | Responder     | CR              | Responder     |
| P13     | HI              | Responder     | HI              | Responder     |
| P14     | CR              | Responder     |                 |               |
| P15     | HI-P            | Responder     |                 |               |
| P16     | No response     | Non-responder |                 |               |
| P17     | CR              | Responder     |                 |               |
| P18     | CR              | Responder     |                 |               |
| P19     | HI              | Responder     |                 |               |
| P20     | HI-E            | Responder     |                 |               |
| P21     | CRbi            | Responder     |                 |               |
| P22     | No response     | Non-responder |                 |               |
| P24     | No response     | Non-responder |                 |               |
| P25     | No response     | Non-responder |                 |               |

**Table S4: Delayed treatment cycles.** Shown are duration and reasons for cycle delays of greater than 3 days.

| Participant | Cycle | Duration (days) | Reason                                           |
|-------------|-------|-----------------|--------------------------------------------------|
| P01         | 7     | 7               | Participant holidays/work                        |
|             | 8     | 7               | Haematological toxicity                          |
|             | 9     | 14              | Haematological toxicity                          |
|             | 10    | 7               | Haematological toxicity                          |
|             | 11    | 7               | Haematological toxicity                          |
|             | 12    | 7               | Haematological toxicity                          |
| P02         | 4     | 21              | Non-haematological toxicity                      |
|             | 6     | 28              | SAE/AE followed by suspected disease progression |
| P03         | 7     | 7               | Unable to obtain PD bloods                       |
| P04         | 1     | 14              | SAE                                              |
| P06         | 2     | 11              | SAE in previous cycle                            |
| P07         | 9     | 11              | Participant holidays/work                        |
| P08         | 4     | 28              | Participant holidays/work                        |
|             | 7     | 21              | Haematological toxicity                          |
|             | 10    | 10              | Haematological toxicity                          |
| P09         | 11    | 7               | SAE                                              |
| P10         | 2     | 7               | Haematological toxicity                          |
| P14         | 5     | 14              | Xmas closure                                     |
|             | 10    | 14              | Suspected disease progression                    |
| P18         | 7     | 4               | Haematological toxicity                          |
| P19         | 2     | 7               | Brief hospitalisation for Colitis (Grade 2)      |
| P23         | 3     | 21              | Non-haematological toxicity                      |
|             | 5     | 14              | Haematological toxicity                          |
| P24         | 3     | 7               | SAE                                              |
|             | 4     | 8               | Haematological toxicity                          |
|             | 5     | 6               | Chest pain - hospitalisation                     |
| P32         | 2     | 7               | Non-haematological toxicity                      |

**Table S5: (A-B) Serious adverse events and adverse events.**

**(A) Serious adverse events (SAE).** Table indicates the number of participants experiencing each SAE in each treatment cycle.

| SAE event                         | Cycle number - injection phase |   |   |   |   |   |       | Cycle number - oral phase |   |   |    |    |    |       |
|-----------------------------------|--------------------------------|---|---|---|---|---|-------|---------------------------|---|---|----|----|----|-------|
|                                   | 1                              | 2 | 3 | 4 | 5 | 6 | Total | 7                         | 8 | 9 | 10 | 11 | 12 | Total |
| febrile neutropaenia              | 3                              | 3 | 4 | 2 |   |   | 12    |                           |   |   |    | 1  |    | 1     |
| anaemia                           | 1                              | 1 | 1 |   |   |   | 3     |                           |   | 1 | 1  |    |    | 2     |
| pyrexia                           |                                |   |   | 1 |   | 2 | 3     | 1                         |   |   |    |    |    | 1     |
| thrombocytopenia                  | 2                              |   |   | 1 |   |   | 3     | 1                         |   |   |    |    |    | 1     |
| sepsis                            |                                |   | 1 |   | 1 |   | 2     |                           |   |   |    |    |    | 0     |
| mouth haemorrhage                 |                                | 1 | 1 |   |   |   | 2     |                           |   |   |    |    |    | 0     |
| musculoskeletal pain              |                                |   | 1 | 1 |   |   | 2     |                           |   |   |    |    |    | 0     |
| upper respiratory tract infection | 1                              |   | 1 |   |   |   | 2     |                           |   |   |    |    |    | 0     |
| rectal haemorrhage                |                                |   |   | 1 |   |   | 1     |                           |   | 1 |    |    | 1  | 2     |
| diarrhoea                         |                                |   |   | 1 |   |   | 1     |                           |   |   | 1  |    |    | 1     |
| neutropenia                       |                                |   |   | 1 |   |   | 1     |                           |   |   | 1  |    |    | 1     |
| abdominal pain                    | 1                              |   |   |   |   |   | 1     |                           |   |   |    |    |    | 0     |
| acute kidney injury               |                                |   | 1 |   |   |   | 1     |                           |   |   |    |    |    | 0     |
| acute pulmonary oedema            |                                |   |   | 1 |   |   | 1     |                           |   |   |    |    |    | 0     |
| anal fissure                      | 1                              |   |   |   |   |   | 1     |                           |   |   |    |    |    | 0     |
| cellulitis                        | 1                              |   |   |   |   |   | 1     |                           |   |   |    |    |    | 0     |
| cerebrovascular accident          | 1                              |   |   |   |   |   | 1     |                           |   |   |    |    |    | 0     |
| coronary artery disease           |                                |   |   | 1 |   |   | 1     |                           |   |   |    |    |    | 0     |
| haemolytic anaemia                | 1                              |   |   |   |   |   | 1     |                           |   |   |    |    |    | 0     |
| haemorrhoid infection             |                                |   | 1 |   |   |   | 1     |                           |   |   |    |    |    | 0     |
| hepatic failure                   |                                |   | 1 |   |   |   | 1     |                           |   |   |    |    |    | 0     |
| hyponatremia                      |                                | 1 |   |   |   |   | 1     |                           |   |   |    |    |    | 0     |
| intra-abdominal haematoma         | 1                              |   |   |   |   |   | 1     |                           |   |   |    |    |    | 0     |
| jejunal perforation               |                                |   |   | 1 |   |   | 1     |                           |   |   |    |    |    | 0     |
| joint swelling                    |                                |   | 1 |   |   |   | 1     |                           |   |   |    |    |    | 0     |
| nasal vestibulitis                |                                |   | 1 |   |   |   | 1     |                           |   |   |    |    |    | 0     |
| oedema peripheral                 | 1                              |   |   |   |   |   | 1     |                           |   |   |    |    |    | 0     |
| pain                              |                                | 1 |   |   |   |   | 1     |                           |   |   |    |    |    | 0     |
| parotid gland enlargement         |                                |   |   | 1 |   |   | 1     |                           |   |   |    |    |    | 0     |
| pericardial effusion              |                                |   | 1 |   |   |   | 1     |                           |   |   |    |    |    | 0     |

|                                    |   |   |   |   |   |   |   |  |   |   |  |   |   |
|------------------------------------|---|---|---|---|---|---|---|--|---|---|--|---|---|
| pneumonia                          |   |   | 1 |   |   | 1 |   |  |   |   |  |   | 0 |
| septic shock                       | 1 |   |   |   |   | 1 |   |  |   |   |  |   | 0 |
| skin infection                     |   | 1 |   |   |   | 1 |   |  |   |   |  |   | 0 |
| soft tissue infection              |   |   |   |   | 1 | 1 |   |  |   |   |  |   | 0 |
| transitional cell carcinoma        |   | 1 |   |   |   | 1 |   |  |   |   |  |   | 0 |
| upper gastrointestinal haemorrhage |   |   |   | 1 |   | 1 |   |  |   |   |  |   | 0 |
| urinary tract infection            |   |   |   |   | 1 | 1 |   |  |   |   |  |   | 0 |
| uterine cancer                     |   |   |   |   |   | 1 | 1 |  |   |   |  |   | 0 |
| myocardial infarction              |   |   |   |   |   | 0 |   |  | 2 |   |  |   | 2 |
| cardiac failure acute              |   |   |   |   |   | 0 |   |  |   |   |  | 1 | 1 |
| escherichia sepsis                 |   |   |   |   |   | 0 |   |  |   | 1 |  |   | 1 |
| lung infection                     |   |   |   |   |   | 0 |   |  |   |   |  | 1 | 1 |
| prostate infection                 |   |   |   |   |   | 0 |   |  | 1 |   |  |   | 1 |

**(B) Adverse events: Grade 4 haematological and Grade 3 non-haematological adverse events (AE).** Table indicates the number of participants experiencing each AE in each treatment cycle.

| AE grade                 | AE event                              | Cycle number - injection phase |           |           |          |          |          |           | Cycle number - oral phase |          |          |          |          |          |           |
|--------------------------|---------------------------------------|--------------------------------|-----------|-----------|----------|----------|----------|-----------|---------------------------|----------|----------|----------|----------|----------|-----------|
|                          |                                       | 1                              | 2         | 3         | 4        | 5        | 6        | Uniq PIDs | 7                         | 8        | 9        | 10       | 11       | 12       | Uniq PIDs |
| HAEM AE Grade 4          | neutropenia                           | 7                              | 9         | 8         | 6        | 4        | 4        | 16        | 5                         | 3        | 4        | 4        | 3        | 3        | 12        |
|                          | thrombocytopenia                      | 11                             | 10        | 6         | 4        | 4        | 3        | 15        | 3                         | 1        | 2        | 3        | 2        | 2        | 9         |
|                          | white blood cell count decreased      | 1                              | 2         | 2         | 2        | 0        | 0        | 3         | 0                         | 0        | 0        | 1        | 0        | 1        | 2         |
| Non HAEM AE Grade 3      | abdominal pain                        |                                |           |           |          |          |          |           | 0                         | 0        | 1        | 0        | 0        | 0        | 1         |
|                          | anxiety                               |                                |           |           |          |          |          |           | 0                         | 0        | 1        | 0        | 0        | 0        | 1         |
|                          | ascites                               | 0                              | 1         | 0         | 0        | 0        | 0        | 1         |                           |          |          |          |          |          |           |
|                          | blood creatinine increased            | 0                              | 0         | 1         | 0        | 0        | 0        | 1         |                           |          |          |          |          |          |           |
|                          | chronic obstructive pulmonary disease | 0                              | 0         | 0         | 1        | 1        | 0        | 1         |                           |          |          |          |          |          |           |
|                          | diarrhoea                             |                                |           |           |          |          |          |           | 1                         | 1        | 1        | 1        | 0        | 0        | 2         |
|                          | epistaxis                             | 0                              | 1         | 0         | 0        | 0        | 0        | 1         |                           |          |          |          |          |          |           |
|                          | haematuria                            |                                |           |           |          |          |          |           | 0                         | 1        | 0        | 0        | 0        | 0        | 1         |
|                          | hyperbilirubinaemia                   | 0                              | 0         | 2         | 0        | 0        | 0        | 2         |                           |          |          |          |          |          |           |
|                          | hyperglycaemia                        | 0                              | 0         | 0         | 1        | 0        | 0        | 1         |                           |          |          |          |          |          |           |
|                          | hypokalaemia                          | 0                              | 0         | 0         | 1        | 0        | 0        | 1         |                           |          |          |          |          |          |           |
|                          | hyponatremia                          | 0                              | 0         | 1         | 0        | 0        | 0        | 1         |                           |          |          |          |          |          |           |
|                          | nausea                                |                                |           |           |          |          |          |           | 1                         | 2        | 0        | 1        | 0        | 0        | 3         |
|                          | sebaceous carcinoma                   | 0                              | 0         | 0         | 0        | 1        | 0        | 1         |                           |          |          |          |          |          |           |
|                          | upper gastrointestinal haemorrhage    | 0                              | 0         | 0         | 0        | 1        | 0        | 1         |                           |          |          |          |          |          |           |
| urinary tract infection  | 0                                     | 1                              | 0         | 0         | 0        | 0        | 1        |           |                           |          |          |          |          |          |           |
| vomiting                 |                                       |                                |           |           |          |          |          | 0         | 0                         | 0        | 1        | 0        | 0        | 1        |           |
| sepsis                   |                                       |                                |           |           |          |          |          | 0         | 0                         | 1        | 0        | 0        | 0        | 1        |           |
| <b>Total unique PIDs</b> |                                       | <b>16</b>                      | <b>19</b> | <b>15</b> | <b>9</b> | <b>8</b> | <b>7</b> | <b>28</b> | <b>8</b>                  | <b>6</b> | <b>7</b> | <b>7</b> | <b>3</b> | <b>4</b> | <b>19</b> |



**Table S6: Myeloid gene panel**

| Gene Names     |                 |                |
|----------------|-----------------|----------------|
| <i>ABCB1</i>   | <i>GATA1</i>    | <i>PTEN</i>    |
| <i>ABCG2</i>   | <i>GATA2</i>    | <i>PTPN11</i>  |
| <i>ABL1</i>    | <i>GATA3</i>    | <i>PTPRT</i>   |
| <i>ALAS2</i>   | <i>GNAS</i>     | <i>RAD21</i>   |
| <i>ANKRD26</i> | <i>GNB1</i>     | <i>RAF1</i>    |
| <i>ASXL1</i>   | <i>HIST1H1E</i> | <i>RPL11</i>   |
| <i>ATM</i>     | <i>HRAS</i>     | <i>RPL35A</i>  |
| <i>ATR</i>     | <i>IDH1</i>     | <i>RPL5</i>    |
| <i>AXL</i>     | <i>IDH2</i>     | <i>RTEL1</i>   |
| <i>BCOR</i>    | <i>IKZF1</i>    | <i>RUNX1</i>   |
| <i>BCORL1</i>  | <i>IL7R</i>     | <i>SAMD9</i>   |
| <i>BRAF</i>    | <i>JAK1</i>     | <i>SAMD9L</i>  |
| <i>BRCA1</i>   | <i>JAK2</i>     | <i>SAMHD1</i>  |
| <i>BRCA2</i>   | <i>JAK3</i>     | <i>SBDS</i>    |
| <i>BRD4</i>    | <i>KDM6A</i>    | <i>SETBP1</i>  |
| <i>CALR</i>    | <i>KIT</i>      | <i>SF1</i>     |
| <i>CBL</i>     | <i>KMT2A</i>    | <i>SF3A1</i>   |
| <i>CCND2</i>   | <i>KRAS</i>     | <i>SF3B1</i>   |
| <i>CDA</i>     | <i>LIG4</i>     | <i>SMARCA2</i> |
| <i>CDKN2A</i>  | <i>MECOM</i>    | <i>SMC1A</i>   |
| <i>CEBPA</i>   | <i>MED12</i>    | <i>SMC3</i>    |
| <i>CSF1R</i>   | <i>MPL</i>      | <i>SRP72</i>   |
| <i>CSF3R</i>   | <i>MYD88</i>    | <i>SRSF2</i>   |
| <i>CTC1</i>    | <i>MYSM1</i>    | <i>STAG2</i>   |
| <i>DAXX</i>    | <i>NOTCH1</i>   | <i>STIM1</i>   |
| <i>DCK</i>     | <i>NPM1</i>     | <i>SYK</i>     |
| <i>DCLK1</i>   | <i>NRAS</i>     | <i>TERC</i>    |
| <i>DDX41</i>   | <i>PARN</i>     | <i>TERT</i>    |
| <i>DIS3</i>    | <i>PDGFRA</i>   | <i>TET2</i>    |
| <i>DKC1</i>    | <i>PHF6</i>     | <i>TINF2</i>   |
| <i>DNAJC21</i> | <i>PIK3CD</i>   | <i>TP53</i>    |
| <i>DNMT3A</i>  | <i>PIK3CG</i>   | <i>TYK2</i>    |
| <i>ERCC6L2</i> | <i>PLCG2</i>    | <i>U2AF1</i>   |
| <i>ETV6</i>    | <i>PPM1D</i>    | <i>U2AF2</i>   |
| <i>EZH2</i>    | <i>PRF1</i>     | <i>WAC</i>     |
| <i>FBXW7</i>   | <i>PRKCB</i>    | <i>WT1</i>     |
| <i>FLT3</i>    | <i>PRKD3</i>    | <i>ZRSR2</i>   |

**Table S7: Variant allele frequencies at diagnosis, C6D29, C12D29 and Progression**

| Patient ID | Variant             | VAF       |        |             |        |
|------------|---------------------|-----------|--------|-------------|--------|
|            |                     | Diagnosis | C6D29  | Progression | C12D29 |
| P01        | IDH2_p.Arg140Trp    | 0         | 0      |             | 0.088  |
|            | ASXL1_p.Glu635fs    | 0.1493    | 0.1232 |             | 0.1714 |
|            | RUNX1_p.His105Gln   | 0.3597    | 0.191  |             | 0.3904 |
|            | SRSF2_p.Pro95His    | 0.3755    | 0.2407 |             | 0.3571 |
|            | STAG2_p.Ser843fs    | 0.6728    | 0.3191 |             | 0.7651 |
| P02        | STAG2_p.Ile920fs    | 0.0625    | 0.3147 | 0.1698      |        |
|            | NRAS_p.Gly12Asp     | 0.2909    | 0.3776 | 0.3013      |        |
|            | TET2_p.Arg1235Gln   | 0.3822    | 0.3669 | 0.323       |        |
|            | ASXL1_p.Leu823fs    | 0.3952    | 0.4062 | 0.3964      |        |
|            | PDGFRA_p.Gln722Glu  | 0.4703    | 0.3973 | 0.4828      |        |
|            | SRSF2_p.Pro95Leu    | 0.4772    | 0.4746 | 0.3574      |        |
|            | STAG2_p.Leu609fs    | 0.6821    | 0.4233 | 0.3547      |        |
| P03        | TP53_p.Pro177His    | 0.248     | 0.0606 |             | 0.0632 |
|            | DNAJC21_p.Lys330Gln | 0.4502    | 0.4566 |             | 0.426  |
| P04        | WT1_p.Thr455fs      | 0.2944    | 0      |             | 0.3361 |
|            | TET2_p.Gln1410*     | 0.3591    | 0.1382 |             | 0.418  |
|            | ASXL1_p.Ile395fs    | 0.3702    | 0.1975 |             | 0.4431 |
|            | TET2_p.Gln1701fs    | 0.451     | 0      |             | 0.4813 |
|            | CSF3R_p.His599Asn   | 0.4541    | 0.4661 |             | 0.5    |
|            | EZH2_p.Thr592fs     | 0.8202    | 0      |             | 0.8577 |
|            | SMC1A_p.Arg711Trp   | 0.8458    | 0.2163 |             | 0.9336 |
| P05        | RUNX1_p.Leu98fs     | 0.3684    | 0.136  |             | 0.2278 |
|            | TET2_p.Arg1237*     | 0.4153    | 0.1829 |             | 0.2236 |
|            | KIT_p.Ala755Val     | 0.4615    | 0.4545 |             | 0.417  |
|            | IKZF1_p.Thr96Met    | 0.49      | 0.4377 |             | 0.4758 |
|            | TET2_.              | 0.5123    | 0.304  |             | 0.3731 |
|            | RTEL1_p.Pro315Arg   | 0.5369    | 0.5074 |             | 0.5409 |
|            | SRSF2_p.Pro95His    | 0.5398    | 0.3247 |             | 0.322  |
| P06        | ETV6_p.Phe368Leu    | 0         |        |             | 0.1298 |
|            | SETBP1_p.Asp868Asn  | 0         |        |             | 0.135  |
|            | TP53_p.His179Gln    | 0.0532    |        |             | 0.1667 |
|            | U2AF1_p.Gln157Pro   | 0.0778    |        |             | 0.1976 |
|            | DNMT3A_p.Arg882Cys  | 0.1033    |        |             | 0.1422 |
| P07        | ASXL1_p.Arg620fs    | 0.2607    | 0.2521 |             | 0      |
|            | KRAS_p.Lys178del    | 0.4186    | 0.4173 |             | 0.5038 |
|            | RUNX1_.             | 0.426     | 0.3396 |             | 0      |
|            | SRSF2_p.Pro95His    | 0.4742    | 0.3248 |             | 0      |
|            | TET2_p.Glu1199fs    | 0.6576    | 0.5801 |             | 0      |
|            | STAG2_p.Arg259*     | 0.6867    | 0.6415 |             | 0      |

| Patient ID | Variant             | VAF       |        |             |        |
|------------|---------------------|-----------|--------|-------------|--------|
|            |                     | Diagnosis | C6D29  | Progression | C12D29 |
| P08        | DNMT3A_p.Arg13Cys   | 0         | 0.2918 | 0.1526      |        |
|            | RUNX1_p.Arg201Gln   | 0.2883    | 0.3956 | 0.1801      |        |
|            | TET2_p.Lys1329Asn   | 0.3036    | 0.3846 | 0.1901      |        |
|            | BCOR_p.Glu401fs     | 0.3051    | 0.0808 | 0           |        |
|            | SRSF2_p.Pro95Arg    | 0.3319    | 0.4062 | 0.2213      |        |
|            | WT1_p.Ala282Val     | 0.3361    | 0.4578 | 0.2073      |        |
|            | DNMT3A_p.Met548Thr  | 0.3577    | 0.4556 | 0.352       |        |
|            | TET2_p.Gln785fs     | 0.3593    | 0.3523 | 0.2521      |        |
|            | TET2_p.Ser1224Arg   | 0.413     | 0.3802 | 0.4177      |        |
| P09        | PARN_.              | 0         | 0.2692 |             |        |
|            | ZRSR2_p.Ser40*      | 0.0644    | 0.064  |             |        |
|            | PHF6_p.Gly10fs      | 0.0704    | 0      |             |        |
| P10        | DDX41_p.Gly548Asp   | 0.0669    | 0.0923 |             | 0      |
|            | DDX41_p.Val463del   | 0.2581    | 0.2656 |             | 0.2151 |
| P11        | RUNX1_p.Arg427fs    | 0         | 0      |             | 0.1688 |
|            | IDH2_p.Arg140Gln    | 0.457     | 0.1958 |             | 0.1519 |
|            | SRSF2_p.Pro95His    | 0.4804    | 0.2155 |             | 0.2028 |
|            | RTEL1_p.Ala73Ser    | 0.5153    | 0.4861 |             | 0.5176 |
| P12        | ZRSR2_p.Glu133Lys   | 0.2258    | 0      |             | 0      |
|            | TET2_.              | 0.411     | 0.3034 |             | 0.3866 |
|            | TET2_p.Asn834fs     | 0.4206    | 0.207  |             | 0.3423 |
|            | PIK3CD_p.Glu646Lys  | 0.4725    | 0.4236 |             | 0.5127 |
|            | ZRSR2_p.Glu133fs    | 0.8544    | 0.1368 |             | 0.2143 |
| P13        | SF3B1_p.Lys700Glu   | 0.0657    | 0      |             | 0      |
|            | TP53_p.Pro151Ser    | 0.112     | 0.1667 |             | 0.1776 |
|            | TERT_p.Ala184Thr    | 0.4554    | 0.4466 |             | 0.4883 |
| P14        | STAG2_.             | 0.0761    | 0      | 0           |        |
|            | GATA2_p.Gly320Asp   | 0.1202    | 0      | 0           |        |
|            | RUNX1_p.Tyr287*     | 0.1392    | 0      | 0           |        |
|            | SF3B1_p.Lys700Glu   | 0.4293    | 0      | 0.1296      |        |
|            | ASXL1_p.Ala1172Thr  | 0.4803    | 0.5    | 0.4808      |        |
|            | BCORL1_p.Arg1333Lys | 0.5278    | 0.5541 | 0.5129      |        |
| P15        | EZH2_p.Arg658Thr    | 0.0529    | 0.0513 |             |        |
|            | DDX41_p.Arg543His   | 0.1362    | 0.0563 |             |        |
| P16        | RUNX1_p.His242Arg   | 0.0753    | 0.0737 |             |        |
|            | DDX41_p.Glu286Lys   | 0.2658    | 0.3307 |             |        |
|            | TET2_p.Gln1653*     | 0.4449    | 0.4649 |             |        |
|            | RUNX1_p.His242fs    | 0.5127    | 0.5769 |             |        |
|            | CBL_p.Cys381Ser     | 0.7123    | 0.7903 |             |        |
|            | ATM_p.Pro1374Leu    | 0.7565    | 0.7897 |             |        |
|            | KMT2A_p.Met2783Ile  | 0.845     | 0.8007 |             |        |
| P17        | ATM_p.Pro960His     | 0.3538    | 0.3926 | 0.4292      |        |

| Patient ID | Variant            | VAF       |        |             |        |
|------------|--------------------|-----------|--------|-------------|--------|
|            |                    | Diagnosis | C6D29  | Progression | C12D29 |
| P18        | ABL1_p.Ser554Cys   | 0         | 0      | 0.344       |        |
|            | WT1_p.Pro136Arg    | 0         | 0      | 0.22        |        |
|            | TP53_p.Cys238Tyr   | 0.3562    | 0      | 0.3761      |        |
|            | TP53_p.Ser106Arg   | 0.4032    | 0      | 0.3867      |        |
| P19        | TET2_p.Ile1370fs   | 0.2973    | 0.0874 |             |        |
|            | KRAS_p.Gly12Arg    | 0.3765    | 0      |             |        |
|            | TET2_p.Gly1309Val  | 0.4922    | 0.176  |             |        |
|            | SRSF2_p.Pro95His   | 0.5424    | 0.2227 |             |        |
| P20        | RAD21_p.Glu399fs   | 0.3525    |        |             |        |
|            | TET2_.             | 0.4352    |        |             |        |
|            | TET2_p.Gln984*     | 0.4453    |        |             |        |
|            | EZH2_p.Gly628Arg   | 0.6437    |        |             |        |
| P21        | TP53_p.Pro301fs    | 0.1799    | 0.2402 |             |        |
|            | TP53_p.Arg273His   | 0.2479    | 0.3686 |             |        |
|            | STIM1_p.Lys672Arg  | 0.5       | 0.5583 |             |        |
|            | BRCA2_p.Lys115Glu  | 0.5083    | 0.4818 |             |        |
|            | RUNX1_p.Pro245Leu  | 0.5849    | 0.6727 |             |        |
| P22        | IDH2_p.Arg172Lys   | 0.403     | 0.4767 |             |        |
| P24        | TP53_p.Pro151Ser   | 0.2209    | 0.2177 |             |        |
| P25        | STAG2_p.Phe466fs   | 0.1038    | 0.0728 |             |        |
|            | STAG2_p.Ser471Asn  | 0.1152    | 0.0876 |             |        |
|            | RUNX1_p.Tyr377*    | 0.1602    | 0.1752 |             |        |
|            | EZH2_p.Glu211fs    | 0.3367    | 0.4128 |             |        |
|            | RUNX1_.            | 0.4115    | 0.4191 |             |        |
|            | EZH2_p.Leu674Ser   | 0.4599    | 0.4256 |             |        |
|            | DAXX_p.Pro540Leu   | 0.5184    | 0.4898 |             |        |
| P27        | TET2_p.Ile1918Asn  | 0.453     |        |             |        |
|            | DNMT3A_.           | 0.457     |        |             |        |
|            | TET2_p.Thr1916fs   | 0.4956    |        |             |        |
|            | KMT2A_p.Val2596Ala | 0.5242    |        |             |        |
|            | PRKD3_.            | 0.6       |        |             |        |
|            | TP53_p.Arg273His   | 0.9437    |        |             |        |
| P28        | RUNX1_p.Arg166Gln  | 0.1286    |        |             |        |
|            | DNMT3A_p.Leu723Pro | 0.212     |        |             |        |
|            | IDH2_p.Arg172Lys   | 0.2816    |        |             |        |
|            | DNMT3A_p.Phe734Ile | 0.2886    |        |             |        |
|            | GNAS_p.Pro96Ala    | 0.4894    |        |             |        |
|            | GATA1_p.Gly89Glu   | 0.5272    |        |             |        |
| P35        | SRSF2_.            | 0.0674    |        |             |        |
|            | DNMT3A_p.Lys343fs  | 0.3158    |        |             |        |
|            | NPM1_p.Pro191Ser   | 0.4051    |        |             |        |
|            | TP53_.             | 0.4313    |        |             |        |

| Patient ID | Variant            | VAF       |       |             |        |
|------------|--------------------|-----------|-------|-------------|--------|
|            |                    | Diagnosis | C6D29 | Progression | C12D29 |
| P38        | MED12_p.Leu10Gln   | 0.0704    |       |             |        |
|            | RUNX1_.            | 0.2924    |       |             |        |
|            | SRSF2_p.Arg94dup   | 0.4352    |       |             |        |
|            | IDH2_p.Arg140Gln   | 0.4684    |       |             |        |
|            | PDGFRA_p.Thr157Ala | 0.486     |       |             |        |
|            | PPM1D_p.Pro500Arg  | 0.508     |       |             |        |
